# Supplementary material for: Lack of Efficacy of High-Titered Immunoglobulin in Patients with West Nile Virus Central Nervous System Disease
Source: PubMed Central journal article supplement (PMC6810207; doi:10.3201/eid2511.190537), 2019-11
Supplement: 19-0537-Techapp-s1.pdf [file 19-0537-Techapp-s1.pdf]

# Lack of Efficacy of High-Titered Immunoglobulin in Patients with West Nile Virus Central Nervous System Disease

## Appendix

The authors acknowledge and thank the investigators and coordinators listed in the following table, who enrolled participants in this study.

| Investigator                 | Affiliation                                                                                                                                                                          | Study coordinator             |
|------------------------------|--------------------------------------------------------------------------------------------------------------------------------------------------------------------------------------|-------------------------------|
| Dr. Amy Guillet Agrawal      | National Institutes of Health Clinical Center, Bethesda, Maryland (now at Holy Cross Hospital, Silver Spring, MD)                                                                    | Deba Reda, RN                 |
| Dr. Fred Aoki                | University of Manitoba Health Sciences Center, Winnipeg, Manitoba, Canada                                                                                                            | Elizabeth Elsie Friesen, RN   |
| Dr. Aristides Assimacopoulos | Avera Research Institute, Sioux Falls, South Dakota (now at St. Alexius Medical Center, Hoffman Estates, IL)                                                                         | Julie Fieldsend, RN           |
| Dr. Martha Buitrago          | Idaho Falls Infectious Diseases, Idaho Falls, Idaho                                                                                                                                  | Shannon Neff, RN              |
| Dr. Paul Carson              | Merit Healthcare System, Fargo, North Dakota (now at North Dakota State University, Fargo, ND)                                                                                       | Brandee Godfrey, BA           |
| Dr. Mazen DiMachkie          | University of Texas at Houston, Houston, Texas (now at University of Kansas Medical Center, Kansas City, KS)                                                                         | Sandi Shaw, RN                |
| Dr. Philip Fracica           | St. Joseph's Hospital and Medical Center, Phoenix, Arizona (now at Bothwell Regional Health Care, Sedalia, MO)                                                                       | Kelli Williamson, RN, MPH     |
| Dr. Alison Freifeld          | University of Nebraska Medical Center, Omaha, Nebraska                                                                                                                               | Penny Hardiman, RN,           |
| Dr. John Gnann               | University of Alabama at Birmingham, Birmingham, AL (now at Medical University of South Carolina, Charleston, SC)                                                                    | Nancy Grady, RN               |
| Dr. Diane Hanfelt-Goade      | University of New Mexico, Albuquerque, New Mexico (now at Tauranga Hospital, Tauranga, New Zealand)                                                                                  | Julianna Ferreira             |
| Dr. Gary Green               | Kaiser Permanente Santa Rosa Medical Center, Santa Rosa, California                                                                                                                  | Susan Kirk, RN                |
| Dr. Robert Grimm (deceased)  | Good Samaritan-Legacy, Portland, Oregon                                                                                                                                              | Lee McCafferty, RN            |
| Dr. John Hagan III           | St. Alexis Medical Center, Bismarck, North Dakota                                                                                                                                    | Julie Wetzstein, CCRC         |
| Dr. Daniel Hanley            | Johns Hopkins Medical Institutions, Baltimore, Maryland                                                                                                                              | Susan M. Rice, RN             |
| Dr. John Hart                | University of Arkansas for Medical Sciences, Little Rock, Arkansas (now at University of Texas Southwestern Medical Center, Dallas, TX)                                              |                               |
| Dr. Rodrigo Hasburn          | Tulane University Health Science Center, New Orleans, Louisiana (now at Memorial Hermann Texas Medical Center, Houston, TX)                                                          | Karen Craig, RN               |
| Dr. Daniel Hinthorn          | University of Kansas Hospital, Kansas City, Kansas                                                                                                                                   | Stacy McCrea-Robertson, MS    |
| Dr. Robert S. Jones          | The Reading Hospital and Medical Center, Reading, Pennsylvania                                                                                                                       | Carolyn Foster, RN, CCRC      |
| Dr. Fred D. Lakeman          | University of Alabama at Birmingham, Birmingham, Alabama (retired)                                                                                                                   |                               |
| Dr. Robert A. Larsen         | Los Angeles County/University of Southern California Medical Center, Los Angeles, California (retired)                                                                               | Edward Lanzo, RN              |
| Dr. Miguel Mogyoros          | Exempla St. Joseph Hospital, Denver, Colorado                                                                                                                                        | Nancy Weber, RN               |
| Dr. Thomas Moore             | Via Christi Hospital St. Francis, Wichita, Kansas (now at Infectious Diseases Consultants, Wichita, KS)                                                                              | Karen Wiant, RN               |
| Dr. Richard Pollard          | University of California, Davis Medical Center, Sacramento, California                                                                                                               | Abby Olusanya, MSN, FNP, CCRP |
| Dr. Jorge Reyno              | Infectious Disease Consultations, Rapid City, South Dakota (now at Martin Luther King, Jr. Community Hospital, Los Angeles, CA)                                                      | Rod Marchlando, RPh, PharmD   |
| Dr. George Risi              | Montana Infectious Disease Specialists, Missoula, Montana (now at US Department of Health and Human Services Biomedical Advanced Research and Development Authority, Washington, DC) | Kelly Dudley, RN              |
| Dr. Jared Spotkov            | Kaiser Permanente South Bay Medical Center, Harbor City, California                                                                                                                  | Christine H. Suh, RN          |

| Investigator           | Affiliation                                                                | Study coordinator |
|------------------------|----------------------------------------------------------------------------|-------------------|
| Dr. Kenneth L. Tyler   | University of Colorado at Denver Anschutz Medical Campus, Aurora, Colorado | Graham Ray, NP    |
| Dr. Richard J. Whitley | University of Alabama at Birmingham, Birmingham, Alabama                   |                   |
